# Supplementary material
Source: publisher figshare collection journal article supplement (https://gsajournals.figshare.com/ndownloader/files/21966381)
Supplement: Supplementary file 1 [file 21966381]

## Sheet: Sheet1
Analysis Type:	PANTHER Overrepresentation Test (Released 20190711)
Annotation Version and Release Date:	GO Ontology database Released 2019-12-09
Analyzed List:	Client Text Box Input (Caenorhabditis elegans)
Reference List:	Caenorhabditis elegans (all genes in database)
Test Type:	FISHER
Correction:	FDR
GO biological process complete	Caenorhabditis elegans - REFLIST (19961)	Client Text Box Input (1381)	Client Text Box Input (expected)	Client Text Box Input (over/under)	Client Text Box Input (fold Enrichment)	Client Text Box Input (raw P-value)	Client Text Box Input (FDR)
positive regulation of protein localization to cell cortex (GO:1904778)	7	7	0.48	+	14.45	1.07e-05	0.000696
regulation of protein localization to cell cortex (GO:1904776)	9	8	0.62	+	12.85	4.32e-06	0.000299
synaptonemal complex assembly (GO:0007130)	6	5	0.42	+	12.05	0.000374	0.0128
eggshell formation (GO:0030703)	17	12	1.18	+	10.2	9.5e-08	1.09e-05
base-excision repair (GO:0006284)	11	7	0.76	+	9.2	7.9e-05	0.00395
positive regulation of protein localization to cell periphery (GO:1904377)	11	7	0.76	+	9.2	7.9e-05	0.00392
synaptonemal complex organization (GO:0070193)	8	5	0.55	+	9.03	0.000935	0.0263
negative regulation of oocyte development (GO:0060283)	9	5	0.62	+	8.03	0.00138	0.0347
negative regulation of cell maturation (GO:1903430)	9	5	0.62	+	8.03	0.00138	0.0345
negative regulation of oocyte maturation (GO:1900194)	9	5	0.62	+	8.03	0.00138	0.0344
negative regulation of oogenesis (GO:1905880)	9	5	0.62	+	8.03	0.00138	0.0343
resolution of meiotic recombination intermediates (GO:0000712)	17	9	1.18	+	7.65	2.21e-05	0.00133
regulation of cell cycle G2/M phase transition (GO:1902749)	19	10	1.31	+	7.61	8.01e-06	0.000531
chitin metabolic process (GO:0006030)	21	11	1.45	+	7.57	2.91e-06	0.000218
DNA biosynthetic process (GO:0071897)	27	14	1.87	+	7.49	1.42e-07	1.44e-05
telomere maintenance via telomerase (GO:0007004)	10	5	0.69	+	7.23	0.00196	0.0451
telomere maintenance via telomere lengthening (GO:0010833)	10	5	0.69	+	7.23	0.00196	0.0449
RNA-dependent DNA biosynthetic process (GO:0006278)	10	5	0.69	+	7.23	0.00196	0.0448
regulation of G2/M transition of mitotic cell cycle (GO:0010389)	18	9	1.25	+	7.23	3.13e-05	0.00179
mitotic G2/M transition checkpoint (GO:0044818)	12	6	0.83	+	7.23	0.000685	0.0205
glucosamine-containing compound metabolic process (GO:1901071)	23	11	1.59	+	6.91	5.72e-06	0.000392
synapsis (GO:0007129)	17	8	1.18	+	6.8	0.000121	0.00535
anatomical structure maturation (GO:0071695)	17	8	1.18	+	6.8	0.000121	0.00531
DNA replication checkpoint (GO:0000076)	15	7	1.04	+	6.75	0.000337	0.012
oocyte maturation (GO:0001556)	15	7	1.04	+	6.75	0.000337	0.0119
nuclear envelope organization (GO:0006998)	15	7	1.04	+	6.75	0.000337	0.0118
negative regulation of cell cycle G2/M phase transition (GO:1902750)	13	6	0.9	+	6.67	0.000947	0.0264
negative regulation of G2/M transition of mitotic cell cycle (GO:0010972)	13	6	0.9	+	6.67	0.000947	0.0263
response to gamma radiation (GO:0010332)	13	6	0.9	+	6.67	0.000947	0.0262
regulation of protein localization to cell periphery (GO:1904375)	18	8	1.25	+	6.42	0.000164	0.00685
positive regulation of meiotic cell cycle (GO:0051446)	27	12	1.87	+	6.42	3.9e-06	0.000276
reciprocal meiotic recombination (GO:0007131)	34	15	2.35	+	6.38	2.63e-07	2.51e-05
homologous recombination (GO:0035825)	34	15	2.35	+	6.38	2.63e-07	2.47e-05
meiotic sister chromatid segregation (GO:0045144)	16	7	1.11	+	6.32	0.000457	0.015
chromosome organization involved in meiotic cell cycle (GO:0070192)	37	16	2.56	+	6.25	1.31e-07	1.4e-05
meiosis I cell cycle process (GO:0061982)	56	24	3.87	+	6.19	1.15e-10	2.42e-08
DNA strand elongation involved in DNA replication (GO:0006271)	14	6	0.97	+	6.19	0.00128	0.0329
DNA strand elongation (GO:0022616)	14	6	0.97	+	6.19	0.00128	0.0328
polar body extrusion after meiotic divisions (GO:0040038)	21	9	1.45	+	6.19	8e-05	0.00391
homologous chromosome segregation (GO:0045143)	19	8	1.31	+	6.09	0.00022	0.00873
response to ionizing radiation (GO:0010212)	31	13	2.14	+	6.06	2.58e-06	0.000196
meiosis I (GO:0007127)	48	20	3.32	+	6.02	5.94e-09	8.5e-07
amino sugar metabolic process (GO:0006040)	29	12	2.01	+	5.98	6.99e-06	0.000473
meiosis II (GO:0007135)	17	7	1.18	+	5.95	0.000609	0.0184
sister chromatid cohesion (GO:0007062)	22	9	1.52	+	5.91	0.000106	0.00492
meiotic chromosome separation (GO:0051307)	27	11	1.87	+	5.89	1.89e-05	0.00117
DNA-dependent DNA replication (GO:0006261)	59	24	4.08	+	5.88	2.69e-10	4.99e-08
cell maturation (GO:0048469)	32	13	2.21	+	5.87	3.42e-06	0.00025
asymmetric protein localization involved in cell fate determination (GO:0045167)	20	8	1.38	+	5.78	0.000291	0.0108
DNA replication initiation (GO:0006270)	15	6	1.04	+	5.78	0.00169	0.0409
meiotic cytokinesis (GO:0033206)	23	9	1.59	+	5.66	0.000139	0.00602
meiotic cell cycle process (GO:1903046)	149	58	10.31	+	5.63	3.68e-22	3.87e-19
meiosis II cell cycle process (GO:0061983)	18	7	1.25	+	5.62	0.000799	0.0231
cell cycle DNA replication (GO:0044786)	18	7	1.25	+	5.62	0.000799	0.023
double-strand break repair (GO:0006302)	65	25	4.5	+	5.56	2.97e-10	5.34e-08
recombinational repair (GO:0000725)	47	18	3.25	+	5.54	9.53e-08	1.07e-05
double-strand break repair via homologous recombination (GO:0000724)	47	18	3.25	+	5.54	9.53e-08	1.05e-05
meiotic nuclear division (GO:0140013)	121	46	8.37	+	5.49	1.57e-17	8.21e-15
female meiotic nuclear division (GO:0007143)	24	9	1.66	+	5.42	0.000181	0.0074
cellular response to radiation (GO:0071478)	16	6	1.11	+	5.42	0.0022	0.0485
embryonic pattern specification (GO:0009880)	46	17	3.18	+	5.34	3.25e-07	2.97e-05
developmental maturation (GO:0021700)	38	14	2.63	+	5.33	3.64e-06	0.000264
meiotic cell cycle (GO:0051321)	207	76	14.32	+	5.31	2.38e-27	4.99e-24
meiotic chromosome segregation (GO:0045132)	82	30	5.67	+	5.29	1.39e-11	3.65e-09
response to UV (GO:0009411)	25	9	1.73	+	5.2	0.000232	0.00907
DNA replication (GO:0006260)	85	30	5.88	+	5.1	2.87e-11	6.96e-09
positive regulation of cell population proliferation (GO:0008284)	20	7	1.38	+	5.06	0.00132	0.0336
mitotic DNA integrity checkpoint (GO:0044774)	23	8	1.59	+	5.03	0.000621	0.0187
regulation of meiotic cell cycle (GO:0051445)	46	16	3.18	+	5.03	1.38e-06	0.000112
cytokinesis (GO:0000910)	55	19	3.81	+	4.99	1.58e-07	1.56e-05
positive regulation of mitotic cell cycle (GO:0045931)	35	12	2.42	+	4.96	3.22e-05	0.00183
chromosome separation (GO:0051304)	35	12	2.42	+	4.96	3.22e-05	0.00181
nucleotide-excision repair (GO:0006289)	38	13	2.63	+	4.94	1.55e-05	0.000975
DNA integrity checkpoint (GO:0031570)	41	14	2.84	+	4.94	7.47e-06	0.0005
cytoskeleton-dependent cytokinesis (GO:0061640)	53	18	3.67	+	4.91	4.1e-07	3.63e-05
DNA recombination (GO:0006310)	90	30	6.23	+	4.82	9.09e-11	1.97e-08
nuclear division (GO:0000280)	175	57	12.11	+	4.71	8.02e-19	6.31e-16
cell fate determination (GO:0001709)	34	11	2.35	+	4.68	0.000105	0.0049
telomere maintenance (GO:0000723)	31	10	2.14	+	4.66	0.00022	0.00881
telomere organization (GO:0032200)	31	10	2.14	+	4.66	0.00022	0.00876
endoderm development (GO:0007492)	25	8	1.73	+	4.63	0.000974	0.0265
response to radiation (GO:0009314)	66	21	4.57	+	4.6	1.13e-07	1.23e-05
nuclear chromosome segregation (GO:0098813)	134	42	9.27	+	4.53	9.22e-14	3.22e-11
embryonic axis specification (GO:0000578)	32	10	2.21	+	4.52	0.000272	0.0102
positive regulation of nuclear division (GO:0051785)	29	9	2.01	+	4.49	0.00057	0.0178
cell cycle checkpoint (GO:0000075)	55	17	3.81	+	4.47	2.5e-06	0.000192
organelle fission (GO:0048285)	185	57	12.8	+	4.45	6.62e-18	4.63e-15
DNA repair (GO:0006281)	182	56	12.59	+	4.45	1.36e-17	8.57e-15
oogenesis (GO:0048477)	105	32	7.26	+	4.41	1.46e-10	2.87e-08
positive regulation of cellular protein localization (GO:1903829)	46	14	3.18	+	4.4	2.19e-05	0.00133
mitotic cell cycle phase transition (GO:0044772)	30	9	2.08	+	4.34	0.000699	0.0208
anterior/posterior axis specification, embryo (GO:0008595)	30	9	2.08	+	4.34	0.000699	0.0207
tripartite regional subdivision (GO:0007351)	30	9	2.08	+	4.34	0.000699	0.0206
positive regulation of cell cycle process (GO:0090068)	50	15	3.46	+	4.34	1.3e-05	0.000834
cell cycle process (GO:0022402)	387	116	26.77	+	4.33	2.09e-34	6.58e-31
digestive tract morphogenesis (GO:0048546)	37	11	2.56	+	4.3	0.000196	0.00794
positive regulation of cell cycle (GO:0045787)	74	22	5.12	+	4.3	1.53e-07	1.53e-05
segmentation (GO:0035282)	34	10	2.35	+	4.25	0.000407	0.0137
blastoderm segmentation (GO:0007350)	34	10	2.35	+	4.25	0.000407	0.0136
sister chromatid segregation (GO:0000819)	82	24	5.67	+	4.23	5.4e-08	6.67e-06
regulation of mitotic cell cycle phase transition (GO:1901990)	48	14	3.32	+	4.22	3.26e-05	0.00181
chromosome segregation (GO:0007059)	163	47	11.28	+	4.17	4.14e-14	1.63e-11
cell division (GO:0051301)	209	60	14.46	+	4.15	1.46e-17	8.36e-15
cortical actin cytoskeleton organization (GO:0030866)	28	8	1.94	+	4.13	0.00179	0.0428
SCF-dependent proteasomal ubiquitin-dependent protein catabolic process (GO:0031146)	35	10	2.42	+	4.13	0.000494	0.0159
dsRNA processing (GO:0031050)	28	8	1.94	+	4.13	0.00179	0.0426
production of small RNA involved in gene silencing by RNA (GO:0070918)	28	8	1.94	+	4.13	0.00179	0.0424
embryonic digestive tract morphogenesis (GO:0048557)	28	8	1.94	+	4.13	0.00179	0.0423
cell cycle (GO:0007049)	500	142	34.59	+	4.1	7.52e-40	4.73e-36
oocyte development (GO:0048599)	46	13	3.18	+	4.08	8.11e-05	0.00393
DNA metabolic process (GO:0006259)	259	73	17.92	+	4.07	1.04e-20	9.32e-18
female gamete generation (GO:0007292)	132	37	9.13	+	4.05	4.16e-11	9.69e-09
mitotic cell cycle checkpoint (GO:0007093)	36	10	2.49	+	4.02	0.000595	0.0184
formation of primary germ layer (GO:0001704)	36	10	2.49	+	4.02	0.000595	0.0183
axis specification (GO:0009798)	72	20	4.98	+	4.02	1.36e-06	0.000111
regulation of cell cycle process (GO:0010564)	159	44	11	+	4	8.77e-13	2.76e-10
oocyte differentiation (GO:0009994)	47	13	3.25	+	4	9.75e-05	0.00461
regulation of cell cycle phase transition (GO:1901987)	58	16	4.01	+	3.99	1.63e-05	0.00102
negative regulation of cell differentiation (GO:0045596)	40	11	2.77	+	3.97	0.000345	0.0121
cellular response to DNA damage stimulus (GO:0006974)	216	59	14.94	+	3.95	1.86e-16	8.99e-14
embryonic digestive tract development (GO:0048566)	33	9	2.28	+	3.94	0.00124	0.0323
negative regulation of cellular amide metabolic process (GO:0034249)	33	9	2.28	+	3.94	0.00124	0.0321
negative regulation of translation (GO:0017148)	33	9	2.28	+	3.94	0.00124	0.032
negative regulation of cell cycle process (GO:0010948)	52	14	3.6	+	3.89	6.8e-05	0.00345
negative regulation of cell cycle (GO:0045786)	94	25	6.5	+	3.84	1.37e-07	1.41e-05
negative regulation of mitotic cell cycle (GO:0045930)	54	14	3.74	+	3.75	9.59e-05	0.00457
mitotic sister chromatid segregation (GO:0000070)	66	17	4.57	+	3.72	1.91e-05	0.00117
mitotic cytokinesis (GO:0000281)	35	9	2.42	+	3.72	0.00175	0.042
response to light stimulus (GO:0009416)	39	10	2.7	+	3.71	0.001	0.027
anatomical structure formation involved in morphogenesis (GO:0048646)	99	25	6.85	+	3.65	3.15e-07	2.92e-05
mitotic cell cycle process (GO:1903047)	242	61	16.74	+	3.64	1.34e-15	5.63e-13
germ cell development (GO:0007281)	160	40	11.07	+	3.61	1.3e-10	2.64e-08
cell cycle phase transition (GO:0044770)	36	9	2.49	+	3.61	0.00206	0.0459
pattern specification process (GO:0007389)	118	29	8.16	+	3.55	6.06e-08	7.2e-06
anterior/posterior axis specification (GO:0009948)	49	12	3.39	+	3.54	0.000463	0.0151
cellular process involved in reproduction in multicellular organism (GO:0022412)	186	45	12.87	+	3.5	2.34e-11	5.9e-09
mitotic cell cycle (GO:0000278)	282	68	19.51	+	3.49	2.08e-16	9.37e-14
anatomical structure homeostasis (GO:0060249)	54	13	3.74	+	3.48	0.000314	0.0114
regulation of nuclear division (GO:0051783)	71	17	4.91	+	3.46	4.22e-05	0.00229
regulation of DNA metabolic process (GO:0051052)	43	10	2.97	+	3.36	0.00188	0.044
gamete generation (GO:0007276)	229	53	15.84	+	3.35	1.73e-12	5.18e-10
gastrulation (GO:0007369)	61	14	4.22	+	3.32	0.000285	0.0106
regulation of mitotic nuclear division (GO:0007088)	48	11	3.32	+	3.31	0.00126	0.0325
mitotic nuclear division (GO:0140014)	79	18	5.47	+	3.29	4.45e-05	0.0024
regulation of cell division (GO:0051302)	58	13	4.01	+	3.24	0.000565	0.0177
regulation of cell cycle (GO:0051726)	283	63	19.58	+	3.22	6.24e-14	2.31e-11
regionalization (GO:0003002)	90	20	6.23	+	3.21	2.34e-05	0.00139
regulation of microtubule cytoskeleton organization (GO:0070507)	60	13	4.15	+	3.13	0.000744	0.0218
tube morphogenesis (GO:0035239)	52	11	3.6	+	3.06	0.00219	0.0484
anterior/posterior pattern specification (GO:0009952)	62	13	4.29	+	3.03	0.000968	0.0265
regulation of mitotic cell cycle (GO:0007346)	149	31	10.31	+	3.01	5.27e-07	4.54e-05
cell fate specification (GO:0001708)	132	27	9.13	+	2.96	3.68e-06	0.000264
regulation of embryonic development (GO:0045995)	70	14	4.84	+	2.89	0.000939	0.0263
positive regulation of reproductive process (GO:2000243)	92	18	6.37	+	2.83	0.000238	0.00925
protein-DNA complex subunit organization (GO:0071824)	87	17	6.02	+	2.82	0.000355	0.0124
sexual reproduction (GO:0019953)	282	55	19.51	+	2.82	1.98e-10	3.77e-08
regulation of cell population proliferation (GO:0042127)	72	14	4.98	+	2.81	0.00119	0.0314
regulation of chromosome organization (GO:0033044)	88	17	6.09	+	2.79	0.000399	0.0135
reproductive process (GO:0022414)	686	132	47.46	+	2.78	9.35e-23	1.18e-19
regulation of microtubule-based process (GO:0032886)	68	13	4.7	+	2.76	0.002	0.0451
digestive system development (GO:0055123)	89	17	6.16	+	2.76	0.000447	0.0148
digestive tract development (GO:0048565)	89	17	6.16	+	2.76	0.000447	0.0147
protein-DNA complex assembly (GO:0065004)	74	14	5.12	+	2.73	0.0015	0.0366
reproduction (GO:0000003)	755	141	52.23	+	2.7	2.63e-23	4.13e-20
multi-organism reproductive process (GO:0044703)	300	56	20.76	+	2.7	6.01e-10	9.96e-08
chromosome organization (GO:0051276)	375	70	25.94	+	2.7	4e-12	1.1e-09
regulation of protein serine/threonine kinase activity (GO:0071900)	75	14	5.19	+	2.7	0.00167	0.0405
cell fate commitment (GO:0045165)	183	34	12.66	+	2.69	1.92e-06	0.000149
gene silencing by RNA (GO:0031047)	87	16	6.02	+	2.66	0.000928	0.0262
embryo development ending in birth or egg hatching (GO:0009792)	304	55	21.03	+	2.62	2.94e-09	4.51e-07
multicellular organismal reproductive process (GO:0048609)	345	61	23.87	+	2.56	6.66e-10	1.08e-07
DNA conformation change (GO:0071103)	102	18	7.06	+	2.55	0.00102	0.0274
regulation of protein kinase activity (GO:0045859)	115	20	7.96	+	2.51	0.000547	0.0174
posttranscriptional regulation of gene expression (GO:0010608)	168	29	11.62	+	2.5	3e-05	0.00174
embryo development (GO:0009790)	510	88	35.28	+	2.49	3.46e-13	1.15e-10
developmental process involved in reproduction (GO:0003006)	395	67	27.33	+	2.45	5.91e-10	1.01e-07
embryonic morphogenesis (GO:0048598)	148	25	10.24	+	2.44	0.000141	0.00606
multicellular organism reproduction (GO:0032504)	364	61	25.18	+	2.42	5.5e-09	8.05e-07
negative regulation of developmental process (GO:0051093)	120	20	8.3	+	2.41	0.000776	0.0225
gene silencing (GO:0016458)	108	18	7.47	+	2.41	0.00147	0.0362
regulation of reproductive process (GO:2000241)	177	29	12.25	+	2.37	7.98e-05	0.00393
negative regulation of multicellular organismal process (GO:0051241)	116	19	8.03	+	2.37	0.00123	0.0324
regulation of cellular localization (GO:0060341)	123	20	8.51	+	2.35	0.000977	0.0264
establishment of organelle localization (GO:0051656)	142	23	9.82	+	2.34	0.000603	0.0183
regulation of protein localization (GO:0032880)	137	22	9.48	+	2.32	0.000879	0.0252
microtubule cytoskeleton organization (GO:0000226)	200	30	13.84	+	2.17	0.000226	0.00889
cellular response to stress (GO:0033554)	524	78	36.25	+	2.15	3.87e-09	5.81e-07
nucleic acid phosphodiester bond hydrolysis (GO:0090305)	157	23	10.86	+	2.12	0.0019	0.0441
regulation of protein phosphorylation (GO:0001932)	159	23	11	+	2.09	0.00206	0.0457
regulation of organelle organization (GO:0033043)	287	41	19.86	+	2.06	5.69e-05	0.00294
negative regulation of gene expression (GO:0010629)	417	59	28.85	+	2.05	1.71e-06	0.000135
regulation of protein modification process (GO:0031399)	228	32	15.77	+	2.03	0.0005	0.016
negative regulation of cellular macromolecule biosynthetic process (GO:2000113)	257	36	17.78	+	2.02	0.000267	0.0101
negative regulation of macromolecule biosynthetic process (GO:0010558)	265	37	18.33	+	2.02	0.000207	0.00835
multi-organism process (GO:0051704)	602	83	41.65	+	1.99	3.34e-08	4.29e-06
microtubule-based process (GO:0007017)	269	37	18.61	+	1.99	0.000238	0.00921
negative regulation of biosynthetic process (GO:0009890)	279	38	19.3	+	1.97	0.000297	0.0109
cytoskeleton organization (GO:0007010)	346	47	23.94	+	1.96	4.49e-05	0.0024
organelle localization (GO:0051640)	215	29	14.87	+	1.95	0.00148	0.0364
negative regulation of cellular biosynthetic process (GO:0031327)	276	37	19.1	+	1.94	0.00043	0.0143
negative regulation of nucleobase-containing compound metabolic process (GO:0045934)	249	33	17.23	+	1.92	0.000901	0.0257
negative regulation of metabolic process (GO:0009892)	585	77	40.47	+	1.9	5.06e-07	4.43e-05
negative regulation of macromolecule metabolic process (GO:0010605)	565	74	39.09	+	1.89	1.11e-06	9.21e-05
negative regulation of cellular process (GO:0048523)	722	94	49.95	+	1.88	5.64e-08	6.83e-06
positive regulation of transcription by RNA polymerase II (GO:0045944)	271	35	18.75	+	1.87	0.000962	0.0265
negative regulation of cellular metabolic process (GO:0031324)	427	55	29.54	+	1.86	4.65e-05	0.00246
organelle organization (GO:0006996)	1199	154	82.95	+	1.86	3.02e-12	8.65e-10
negative regulation of biological process (GO:0048519)	972	123	67.25	+	1.83	1.46e-09	2.3e-07
negative regulation of nitrogen compound metabolic process (GO:0051172)	407	51	28.16	+	1.81	0.000156	0.00661
cell differentiation (GO:0030154)	808	101	55.9	+	1.81	8.62e-08	1e-05
positive regulation of nucleobase-containing compound metabolic process (GO:0045935)	346	43	23.94	+	1.8	0.000552	0.0175
anatomical structure morphogenesis (GO:0009653)	525	65	36.32	+	1.79	2.71e-05	0.00158
regulation of multicellular organismal development (GO:2000026)	357	44	24.7	+	1.78	0.000639	0.0192
cellular developmental process (GO:0048869)	821	101	56.8	+	1.78	1.61e-07	1.56e-05
regulation of protein metabolic process (GO:0051246)	476	58	32.93	+	1.76	0.000112	0.00514
positive regulation of nitrogen compound metabolic process (GO:0051173)	526	64	36.39	+	1.76	5.7e-05	0.00292
regulation of cellular protein metabolic process (GO:0032268)	453	55	31.34	+	1.75	0.000167	0.00685
positive regulation of transcription, DNA-templated (GO:0045893)	313	38	21.65	+	1.75	0.00198	0.0449
positive regulation of RNA biosynthetic process (GO:1902680)	331	40	22.9	+	1.75	0.00183	0.0429
positive regulation of nucleic acid-templated transcription (GO:1903508)	331	40	22.9	+	1.75	0.00183	0.0427
cell development (GO:0048468)	390	47	26.98	+	1.74	0.000749	0.0218
positive regulation of macromolecule metabolic process (GO:0010604)	573	69	39.64	+	1.74	3.99e-05	0.00218
nucleic acid metabolic process (GO:0090304)	927	111	64.13	+	1.73	1.34e-07	1.41e-05
positive regulation of RNA metabolic process (GO:0051254)	336	40	23.25	+	1.72	0.00199	0.045
positive regulation of gene expression (GO:0010628)	392	46	27.12	+	1.7	0.00113	0.0301
response to stress (GO:0006950)	975	114	67.46	+	1.69	3.47e-07	3.12e-05
regulation of cellular component organization (GO:0051128)	507	58	35.08	+	1.65	0.000489	0.0158
developmental process (GO:0032502)	1851	207	128.06	+	1.62	6.04e-11	1.36e-08
anatomical structure development (GO:0048856)	1739	194	120.31	+	1.61	3.23e-10	5.66e-08
positive regulation of metabolic process (GO:0009893)	632	70	43.72	+	1.6	0.00031	0.0113
positive regulation of cellular metabolic process (GO:0031325)	580	64	40.13	+	1.59	0.000602	0.0184
multicellular organism development (GO:0007275)	1594	172	110.28	+	1.56	4.18e-08	5.26e-06
positive regulation of cellular process (GO:0048522)	924	99	63.93	+	1.55	5.09e-05	0.00267
cellular component organization (GO:0016043)	1720	183	119	+	1.54	3.04e-08	3.99e-06
positive regulation of biological process (GO:0048518)	1176	122	81.36	+	1.5	2.6e-05	0.00153
nucleobase-containing compound metabolic process (GO:0006139)	1181	122	81.71	+	1.49	3.43e-05	0.00189
regulation of macromolecule metabolic process (GO:0060255)	1676	169	115.95	+	1.46	3e-06	0.000222
cellular aromatic compound metabolic process (GO:0006725)	1235	124	85.44	+	1.45	0.000101	0.00473
cellular component organization or biogenesis (GO:0071840)	1857	185	128.48	+	1.44	1.67e-06	0.000133
heterocycle metabolic process (GO:0046483)	1230	122	85.1	+	1.43	0.000158	0.00663
regulation of metabolic process (GO:0019222)	1781	175	123.22	+	1.42	8.56e-06	0.000562
organic cyclic compound metabolic process (GO:1901360)	1279	125	88.49	+	1.41	0.000253	0.00967
regulation of nitrogen compound metabolic process (GO:0051171)	1474	143	101.98	+	1.4	0.000118	0.00529
regulation of primary metabolic process (GO:0080090)	1493	144	103.29	+	1.39	0.000131	0.00572
regulation of gene expression (GO:0010468)	1327	127	91.81	+	1.38	0.000488	0.0158
cellular macromolecule metabolic process (GO:0044260)	2321	220	160.58	+	1.37	4.11e-06	0.000288
regulation of cellular metabolic process (GO:0031323)	1563	148	108.14	+	1.37	0.000265	0.0101
macromolecule metabolic process (GO:0043170)	3048	269	210.88	+	1.28	5.37e-05	0.0028
multicellular organismal process (GO:0032501)	2314	201	160.09	+	1.26	0.00139	0.0343
cell communication (GO:0007154)	1806	92	124.95	-	0.74	0.00205	0.0459
signaling (GO:0023052)	1773	90	122.66	-	0.73	0.00221	0.0484
gene expression (GO:0010467)	899	39	62.2	-	0.63	0.00222	0.0485
response to chemical (GO:0042221)	1045	43	72.3	-	0.59	0.000297	0.0109
organonitrogen compound biosynthetic process (GO:1901566)	766	31	53	-	0.58	0.00157	0.0383
oxidation-reduction process (GO:0055114)	633	23	43.79	-	0.53	0.000915	0.026
small molecule metabolic process (GO:0044281)	731	25	50.57	-	0.49	0.000116	0.00522
ion transmembrane transport (GO:0034220)	567	17	39.23	-	0.43	0.000155	0.00661
inorganic ion transmembrane transport (GO:0098660)	389	11	26.91	-	0.41	0.000976	0.0265
carboxylic acid metabolic process (GO:0019752)	362	10	25.04	-	0.4	0.00133	0.0335
organic acid metabolic process (GO:0006082)	438	11	30.3	-	0.36	0.000136	0.0059
oxoacid metabolic process (GO:0043436)	399	10	27.6	-	0.36	0.000331	0.0118
cellular amide metabolic process (GO:0043603)	452	11	31.27	-	0.35	7.64e-05	0.00385
peptide metabolic process (GO:0006518)	373	9	25.81	-	0.35	0.000319	0.0115
amide biosynthetic process (GO:0043604)	306	7	21.17	-	0.33	0.00104	0.0277
translation (GO:0006412)	269	6	18.61	-	0.32	0.00181	0.0427
peptide biosynthetic process (GO:0043043)	274	6	18.96	-	0.32	0.00132	0.0335
system process (GO:0003008)	602	13	41.65	-	0.31	6.76e-07	5.76e-05
nervous system process (GO:0050877)	543	11	37.57	-	0.29	1.09e-06	9.13e-05
G protein-coupled receptor signaling pathway (GO:0007186)	692	14	47.88	-	0.29	2.28e-08	3.06e-06
chemosensory behavior (GO:0007635)	230	4	15.91	-	0.25	0.00114	0.0302
sulfur compound metabolic process (GO:0006790)	196	3	13.56	-	0.22	0.00198	0.0449
ribosome biogenesis (GO:0042254)	191	2	13.21	-	0.15	0.000553	0.0174
olfactory behavior (GO:0042048)	195	2	13.49	-	0.15	0.000373	0.0128
cofactor metabolic process (GO:0051186)	198	2	13.7	-	0.15	0.000393	0.0134
ribonucleoprotein complex biogenesis (GO:0022613)	253	2	17.5	-	0.11	1.47e-05	0.000938
sensory perception (GO:0007600)	396	3	27.4	-	0.11	1.39e-08	1.9e-06
mitochondrion organization (GO:0007005)	141	1	9.76	-	0.1	0.00162	0.0394
generation of precursor metabolites and energy (GO:0006091)	166	1	11.48	-	0.09	0.000365	0.0126
detection of chemical stimulus involved in sensory perception of smell (GO:0050911)	172	1	11.9	-	0.08	0.00025	0.00959
detection of chemical stimulus involved in sensory perception (GO:0050907)	175	1	12.11	-	0.08	0.000165	0.00683
sensory perception of smell (GO:0007608)	181	1	12.52	-	0.08	0.000113	0.00515
detection of chemical stimulus (GO:0009593)	182	1	12.59	-	0.08	0.000113	0.00514
sensory perception of chemical stimulus (GO:0007606)	373	2	25.81	-	0.08	7.77e-09	1.09e-06
detection of stimulus involved in sensory perception (GO:0050906)	191	1	13.21	-	0.08	8.16e-05	0.00392
ribonucleoprotein complex subunit organization (GO:0071826)	104	0	7.2	-	< 0.01	0.00197	0.0449
tRNA metabolic process (GO:0006399)	121	0	8.37	-	< 0.01	0.000578	0.0179
ribonucleoprotein complex assembly (GO:0022618)	102	0	7.06	-	< 0.01	0.0019	0.044
protein localization to membrane (GO:0072657)	105	0	7.26	-	< 0.01	0.00202	0.0453
